# Supplementary material for: Virtual Screening for Potential Phytobioactives as Therapeutic Leads to Inhibit NQO1 for Selective Anticancer Therapy
Source: MDPI journal article supplement (doi:10.3390/molecules26226863), 2021-11-14
Supplement: s1 [file s1]

## Supplementary Data

**Table S1.** List of some synthetic and semi-synthetic compounds screened against NQO1.

|    |           |                                                                                |
|----|-----------|--------------------------------------------------------------------------------|
| 1  | 2244      | Aspirin                                                                        |
| 2  | 89105     | Tretazicar                                                                     |
| 3  | 216210    | Dabigatran                                                                     |
| 4  | 54678486  | Warfarin                                                                       |
| 5  | 1183      | Vanillin                                                                       |
| 6  | 98527     | Dimethoxy-4-Bromophenetholamine                                                |
| 7  | 154482    | Hexabromo-1,1 Biphenyl                                                         |
| 8  | 332529    | 9-(3,4-Dimethoxyphenyl)-5-hydroxy-6H-[2]benzofuro[5,6-f][1,3]Benzodioxol-8-One |
| 9  | 442664    | Vicenin                                                                        |
| 10 | 442882    | Justicidin                                                                     |
| 11 | 3633866   | Naphthalen-2-Ylsulfonyl                                                        |
| 12 | 4470790   | ES-936                                                                         |
| 13 | 10397115  | 2-(Aziridin-1-yl)-5-methyl-1,4-benzoquinone                                    |
| 14 | 101916320 | 4-0-Demethyl Suchilactone                                                      |

**Table S2.** Binding affinity and hydrogen bonding interaction of molecular docking analysis of phytobioactives against NQO1 (2F1O) Protein.

| Sl No | Compound CID | Ligand        | Binding Affinity Kcal/mol | Hydrogen bonding forming Amino Acid residues |
|-------|--------------|---------------|---------------------------|----------------------------------------------|
| 1     | 87310        | Alliin        | -4.2                      | Lue 103, Tyr 155(2), Gly 150, Tpr 105        |
| 2     | 54670067     | Ascorbic acid | -5.1                      | Phe 106, Lys A 113.                          |
| 3     | 1183         | Vanillin      | -4.8                      | Ala 223.                                     |
| 4     | 5576         | Trimethadi    | -6                        | Trp 105 (2), Gly149,                         |

|    |           |                       |      |                                                                        |
|----|-----------|-----------------------|------|------------------------------------------------------------------------|
|    |           | one                   |      | Gly 150.                                                               |
| 5  | 11958     | Benzoquinone          | -4.8 | Tyr 155, Trp 105.                                                      |
| 6  | 370       | Gallic acid           | -4.8 | Val 108.                                                               |
| 7  | 2153      | Theophylline          | -4.9 | Lue 103, Tyr 102.                                                      |
| 8  | 89105     | Tretazicar            | -6.8 | Lue 103, Gly 150.                                                      |
| 9  | 16871     | Napthoquinone         | -5.4 | Trp 105, His161, Tyr 155.                                              |
| 10 | 5746      | MYTOMYCIN             | -8.1 | Trp 105, Gly 149.                                                      |
| 11 | 10280735  | Edoxaban              | -7.8 | His 11, His 194.                                                       |
| 12 | 5884      | NADPH                 | -7.3 | Gln 187 (2), Pro 186, Lue 188 (2), Tyr 190, Gly 206, Arg 210, Lys 270. |
| 13 | 10429233  | Dihydrocurcumin       | -5.2 | Trp 105, Tyr 155.                                                      |
| 14 | 5280445   | Luteolin              | -6.6 | Pro 68, Gly 122.                                                       |
| 15 | 4470790   | ES-936                | -7.4 | Tyr 67.                                                                |
| 16 | 295934    | Deoxynyboquinone      | -6.5 | Gly 149, Tyr 105, Tyr 155, His 169.                                    |
| 17 | 9875401   | Rivaroxaban           | -7.2 | Lys 270, Tyr 190                                                       |
| 18 | 11250888  | $\beta$ -NADH         | -7.5 | Gly 149, Tyr 155.                                                      |
| 19 | 117587706 | Dihydronaphthalene    | -6.3 | Tyr 126.                                                               |
| 20 | 101916320 | Demethyl Suchilaceone | -7   | Ile 50, Lys 270.                                                       |

|    |          |                    |      |                   |
|----|----------|--------------------|------|-------------------|
| 21 | 5281675  | ORIENTIN           | -6.6 | Tyr190, Gly150.   |
| 22 | 11617    | DIALLYL<br>SULFIDE | -2.9 | Phe 106.          |
| 23 | 5386591  | Ajoene             | -3.3 | Ile 164           |
| 24 | 896      | Melatonin          | -5.6 | Leu 157, Asp 266. |
| 25 | 54676038 | Dicumarol          | -6.9 | Val 108, Phe 106. |
| 26 | 4055     | Menadione          | -5.2 | Lys 113.          |
| 27 | 5281672  | Myricetin          | -6.6 | Phe 178, Pro 68.  |

---
